# Supplementary material
Source: PubMed Central journal article supplement (PMC7443466)
Supplement: BPH-177-4147-s001.pdf [file BPH-177-4147-s001.pdf]

---

**Supplementary Figure Legends****FIGURE S1**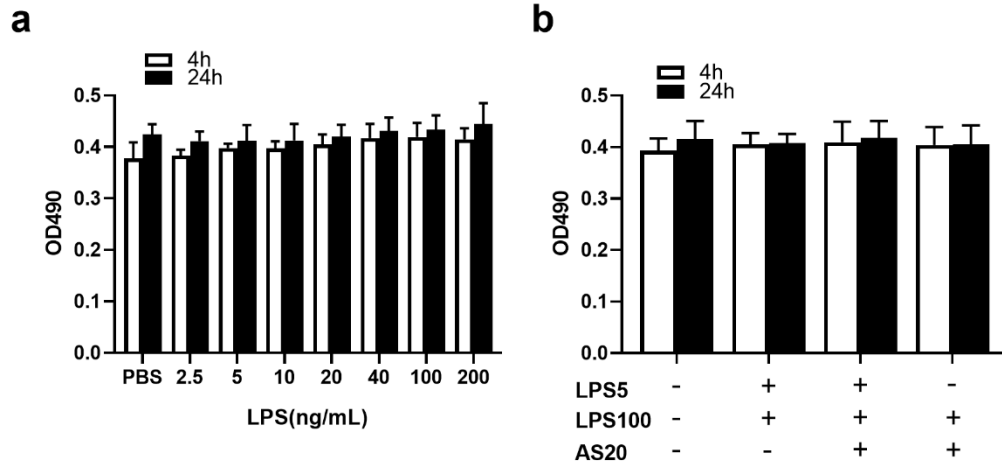

**FIGURE S1.** Cytotoxicity of LPS toward RAW264.7 cells (n = 5). (a) The OD490 value of LPS (2.5–200 ng/mL) treatment for 4 h or for 24 h in RAW264.7 cells. (b) The OD490 value of treatment groups (LPS5+LPS100, LPS5+LPS100+AS, and LPS100+AS) for 4 h or for 24 h in RAW264.7 cells. One-way ANOVA.

FIGURE S2

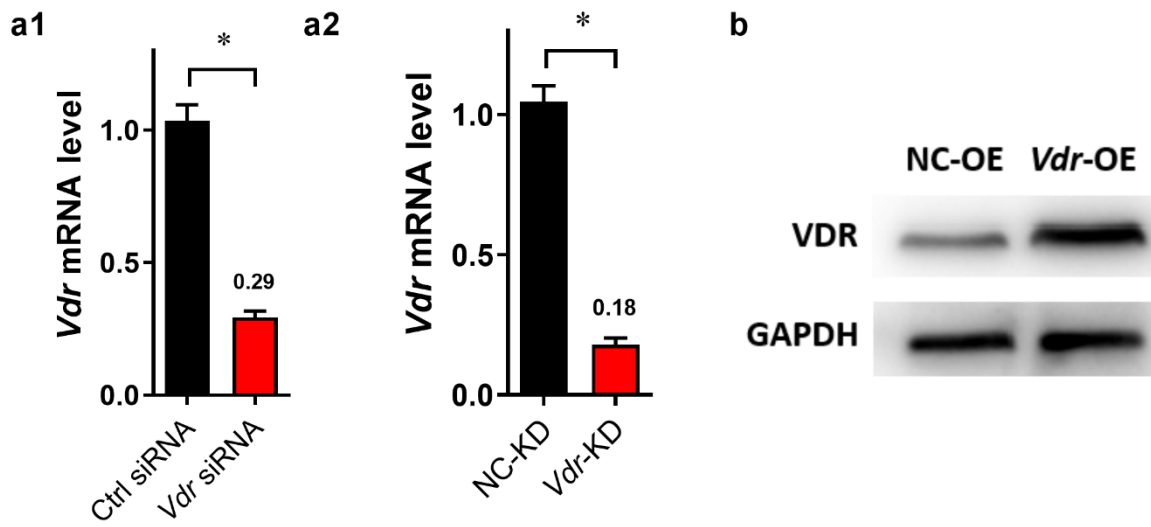

**FIGURE S2.** Efficiency of modified VDR. (a) *Vdr* mRNA level in the *Vdr*-KD and NC-KD RAW264.7 cells knocked down by a *Vdr* siRNA (a1) and lentivirus vector harboring a *Vdr* shRNA (a2). (b) Immunoblotting assays of VDR in *Vdr*-OE and NC-OE RAW264.7 cells. Student's *t* test; \*  $P < 0.05$ .

FIGURE S3

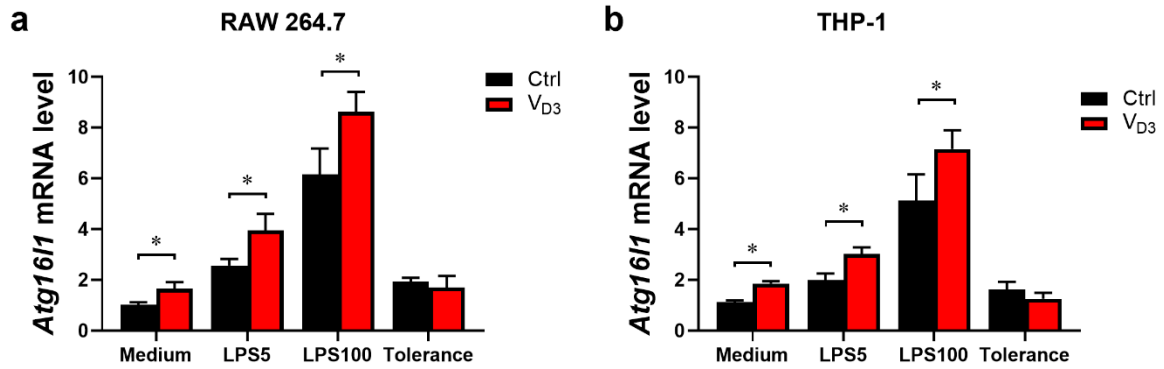

**FIGURE S3.** Effect of  $V_{D3}$  (100 nM) on the mRNA level of *Vdr* and *Atg1611* in LPS treated cells and LPS-tolerant cells. (a-b) Effect of  $V_{D3}$  (100 nM) on the mRNA level of *Atg1611* in LPS treated cells and LPS-tolerant cells in RAW 264.7 cells (a) and THP-1 cells (b). One-way ANOVA followed by Tukey's post hoc test; \*  $P < 0.05$ .

## FIGURE S4

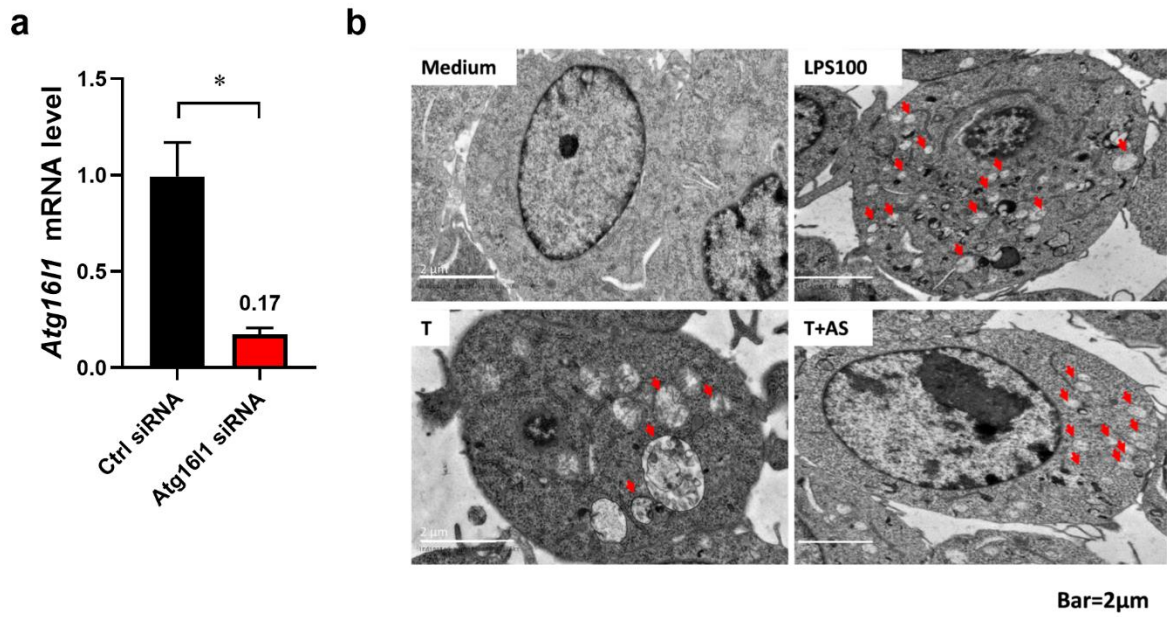

**FIGURE S4.** AS's effect is related to VDR-regulated autophagy. (a) *Vdr* mRNA level in the *Vdr*-KD and NC-KD RAW264.7 cells. (b) Effect of AS on autophagy vesicles in LPS-tolerant RAW264.7 cells under transmission electron microscopy. Student's *t* test; \*  $P < 0.05$ .

**FIGURE S5**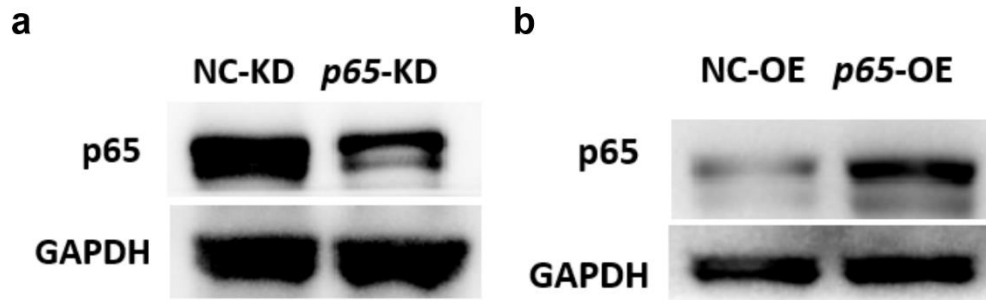

**FIGURE S5.** Efficiency of modified NF- $\kappa$ B P65. (a) Immunoblotting assays of NF- $\kappa$ B p65 (p65) in *p65*-KD and NC-KD RAW264.7 cells. (b) Immunoblotting assays of NF- $\kappa$ B p65 in *p65*-OE and NC-OE RAW264.7 cells.

**FIGURE S6**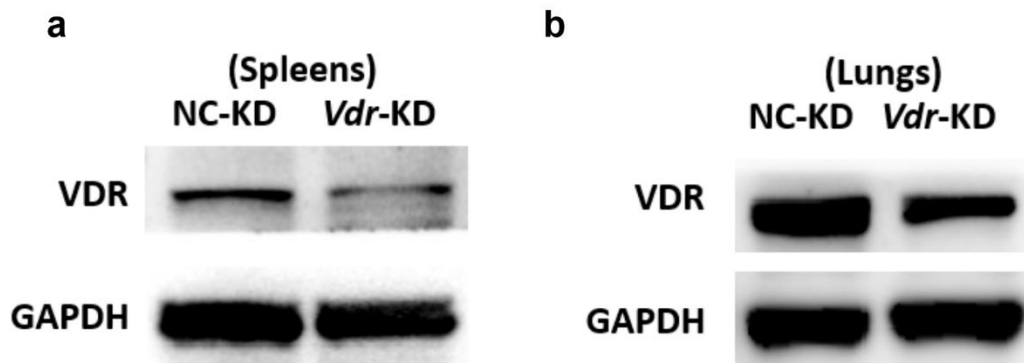

**FIGURE S6.** Efficiency of VDR knockdown in the lungs and spleen. (a) Immunoblotting assays of VDR in the spleen of NC-KD and *Vdr*-KD mice. (b) Immunoblotting assays of VDR in the lungs of NC-KD and *Vdr*-KD mice.

---

**Supplementary Table 1. Antibodies for Immunofluorescence and Western blotting**


---

| Antibody                    | Company                      | Catalog | Dilution ratio       | RRID        |
|-----------------------------|------------------------------|---------|----------------------|-------------|
| anti-NF- $\kappa$ B p65     | Cell Signaling<br>Technology | #9460   | 1:200/1:1000 (IF/WB) | AB_2797704  |
| anti-VDR                    | Cell Signaling<br>Technology | #12550S | 1:200/1:1000 (IF/WB) | AB_2637002  |
| anti-LC3B                   | Sigma-Aldrich                | #L7543  | 1:200/1:5000 (IF/WB) | AB_796155   |
| anti-ATG5                   | Sigma-Aldrich                | #A0731  | 1:1000 (WB)          | AB_796188   |
| anti-ATG16L1                | Cell Signaling<br>Technology | #8089   | 1:1000 (WB)          | AB_10950320 |
| anti-GAPDH                  | Cell Signaling<br>Technology | #2118   | 1:2000 (WB)          | AB_561053   |
| anti-rabbit IgG<br>(AF 488) | Cell Signaling<br>Technology | #4412   | 1:200 (IF)           | AB_1904025  |
| anti-mouse IgG<br>(AF 488)  | Cell Signaling<br>Technology | #4408   | 1:200 (IF)           | AB_10694704 |
| anti-rabbit IgG<br>(AF 555) | Cell Signaling<br>Technology | #3969   | 1:200 (IF)           | AB_10950227 |

---

---

**Supplementary Table 2. Primer sequences for Real-time PCR**


---

| Gene                           | Species | Forward (5' -> 3')     | Reverse (5' -> 3')    |
|--------------------------------|---------|------------------------|-----------------------|
| <i>Atg16l1</i>                 | mouse   | AAGCCGAATCTGGACTGTGG   | TATGCAGACTTTGCTGCGGA  |
| <i>Vdr</i>                     | mouse   | GAATGTGCCTCGGATCTGTGG  | ATGCGGCAATCTCCATTGAAG |
| <i>Actb</i> *                  | mouse   | CGTAAAGACCTCTATGCCAACA | TAGGAGCCAGGGCAGTAATC  |
| <i>TNF-<math>\alpha</math></i> | human   | TCCTTCAGACACCCTCAACC   | AGGCCCCAGTTTGAATTCTT  |
| <i>IL-6</i>                    | human   | GGCCCTTGCTTTCTCTTCG    | ATAATAAAGTTTTGATTATGT |
| <i>GAPDH</i>                   | human   | GAAGGTGAAGGTCGGAGTC    | GAAGATGGTGATGGGATTTC  |

---

\**Actb* encodes  $\beta$ -actin



---

**Supplementary Table 3. Promoter specific sequences for *Atg16l1***

---

| Gene           | Species | Forward (5' -> 3') | Reverse (5' -> 3')    |
|----------------|---------|--------------------|-----------------------|
| <i>Atg16l1</i> | mouse   | GGTCCGTTCTTGTTTCT  | TCAAGTTGTCTCCAAGATTAT |

---
